# Supplementary material
Source: PubMed Central journal article supplement (PMC5886047)
Supplement: ddx367_hmg-2017-twb-00504_r2-online_supplementary_data.pdf [file ddx367_hmg-2017-twb-00504_r2-online_supplementary_data.pdf]

**Title:**

Mutation-specific downregulation of CFTR2 variants by gating potentiators

**Authors:**

Radu G. Avramescu, Yukari Kai, Haijin Xu, Aurélien Bidaud-Meynard, Andrea Schnúr, Saul Frenkiel, Elias Matouk, Guido Veit, Gergely L. Lukacs

**Online Data Supplement**

## Supplementary figures

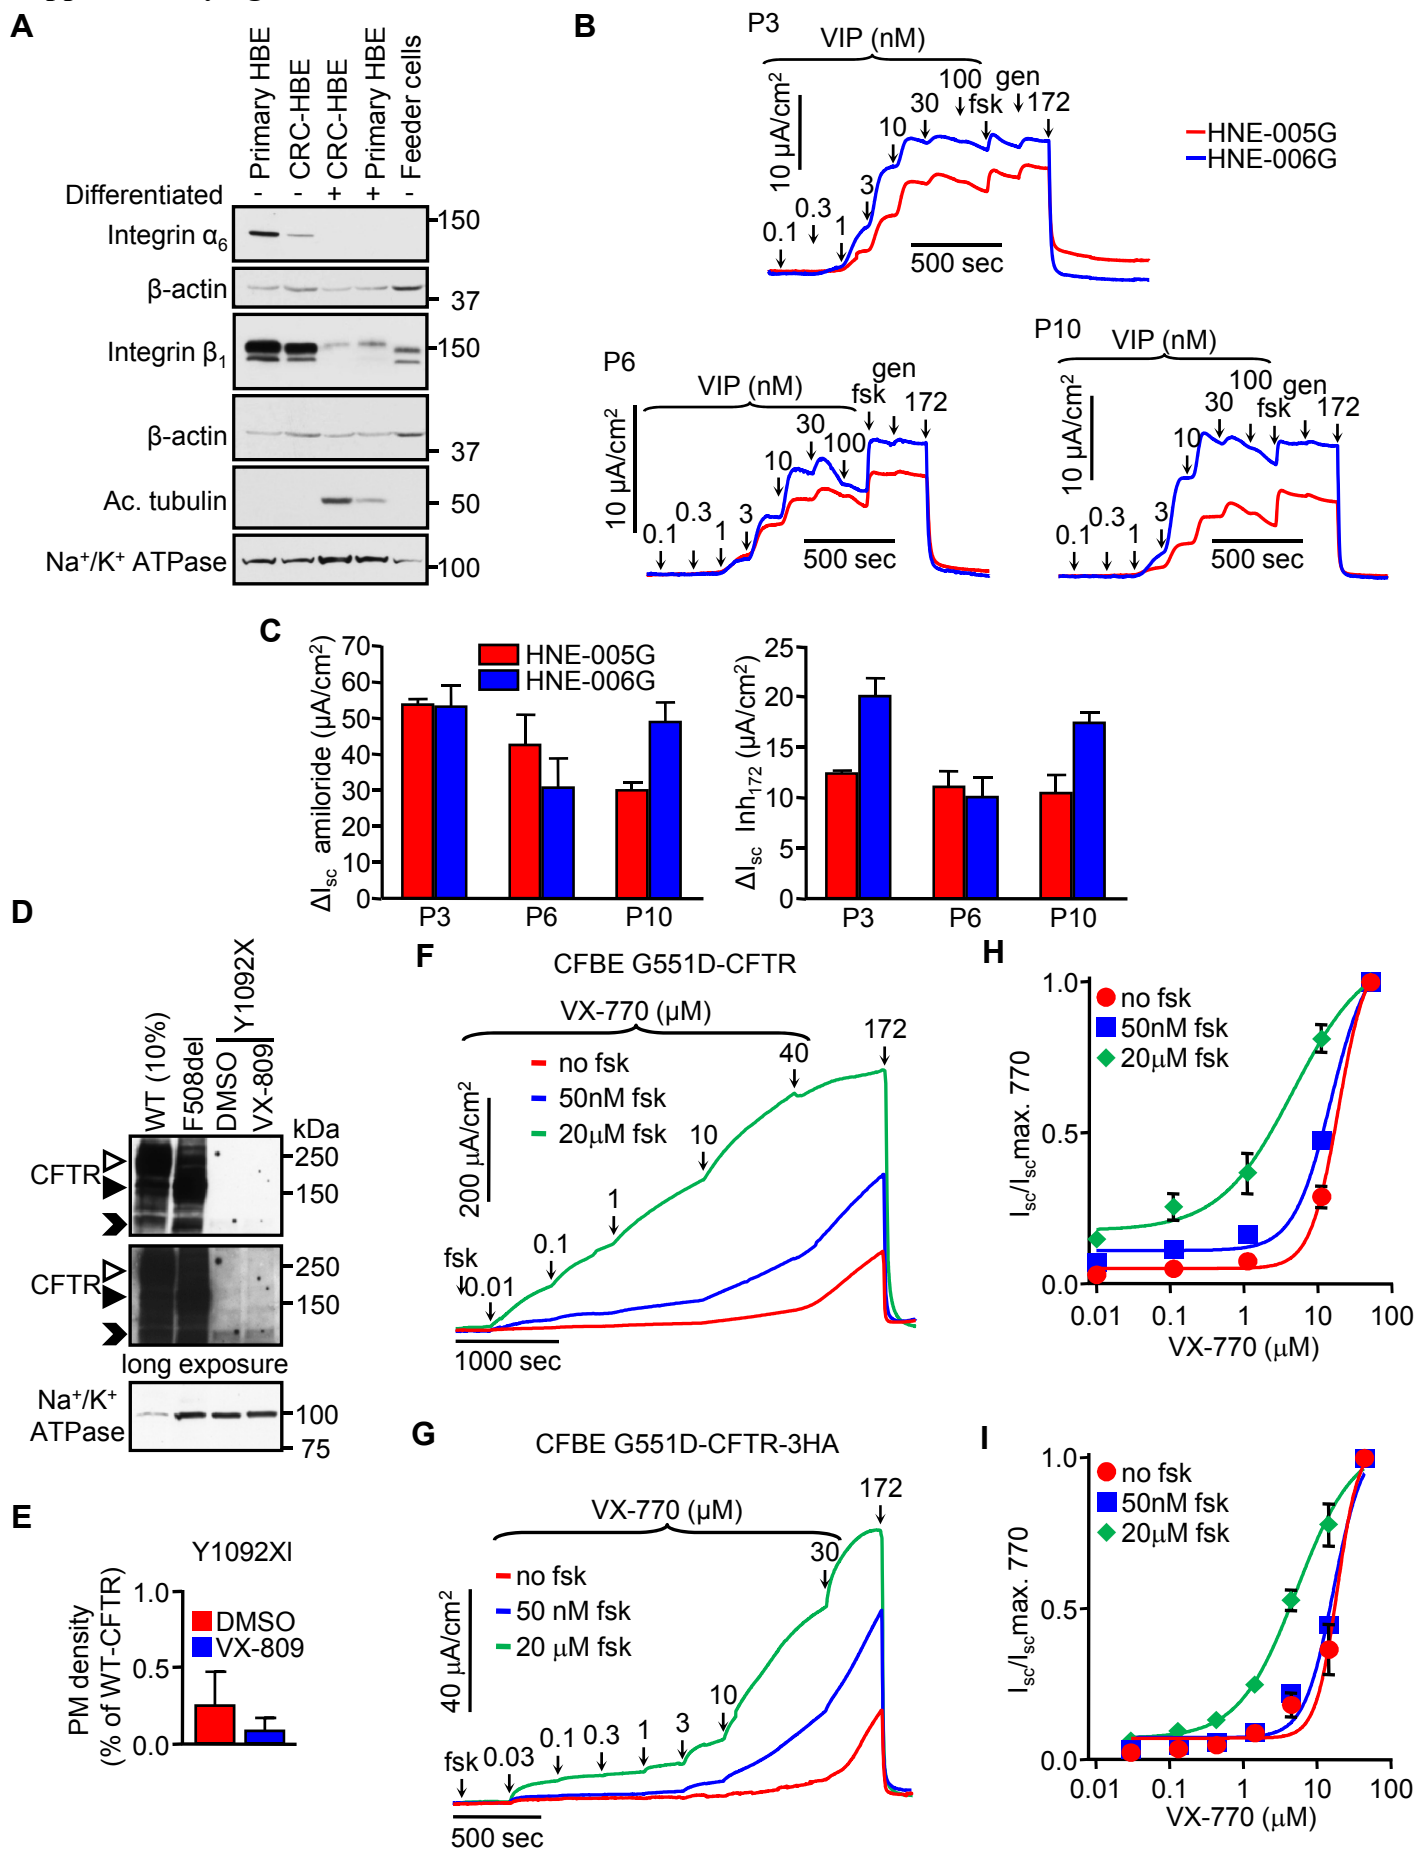

**Figure E1.** The electrophysiological phenotype of HNE is stable over multiple passages. **(A)** Primary HBE are reprogrammed and expanded in medium F in presence of irradiated 3T3-J2 feeder cells and ROCK inhibitor (Y-27632, 10  $\mu\text{M}$ ) followed by differentiation in Ultrosor G medium on Snapwell filter membrane supports under air-liquid (ALI) conditions. Immunoblot shows down-regulation of cell-matrix adhesion molecules integrin  $\beta_1$  and  $\alpha_6$  and up-regulation of cilium marker acetylated tubulin upon differentiation and polarization in Ultrosor G medium under ALI for 4 weeks as indicated. Non-polarized HBE cells were cultured on collagen coated dishes until passage 2. **(B)** CR-HNE from two *CFTR*<sup>WT/WT</sup> donors (donor code: HNE-005G and HNE-006G) were propagated for 10 passages and their electrophysiological properties were compared after differentiation for passages (P) 3, 6 and 10 by  $I_{sc}$  measurement. **(C)** Comparison between cells differentiated at passages 3, 6, 10 showed similar amiloride-sensitive (100  $\mu\text{M}$ ) ENaC currents and CFTR<sub>inh</sub>-172 sensitive (172, 20  $\mu\text{M}$ ) CFTR currents after stimulation with vasoactive intestinal peptide (VIP), forskolin (fsk, 20  $\mu\text{M}$ ) and genistein (gen, 50  $\mu\text{M}$ ). Experiments performed in presence of a basolateral-to-apical chloride gradient; error bars are SD of three parallel measurements. **(D)** Immunoblots of CFBE cells expressing the indicated CFTR constructs after incubation for 24h with and without VX-809 (3  $\mu\text{M}$ ). CFTR was detected with anti-HA antibody, Na<sup>+</sup>/K<sup>+</sup> ATPase served as loading control. The empty arrowheads show the mature, complex glycosylated CFTR protein (C-band), the filled arrowhead show the immature, core glycosylated protein (B-band) and the filled chevrons show truncated core glycosylated protein. **(E)** PM density of CFBE cells expressing Y1092X-CFTR mutant after 24h treatment with and without VX-809 (3  $\mu\text{M}$ ). The PM densities were normalized for cell viability and are expressed as % of WT-CFTR. **(F, G)**  $I_{sc}$  of CFBE cells expressing CFTR-G551D (D) or CFTR-G551D with an extracellular 3HA tag (E) under the control of a TetON doxycycline controlled transactivator. CFTR was activated with the indicated forskolin (fsk) concentrations followed by VX-770 titration. The specificity of the short circuit current was verified by adding the CFTR-specific inhibitor, CFTR<sub>inh</sub>-172 (20  $\mu\text{M}$ ). Measurements were performed in the presence of a basolateral-to-apical chloride gradient after basolateral permeabilization with amphotericin B (100  $\mu\text{M}$ ). **(H, I)** Dose-response to VX-770 stimulation of G551D-CFTR (F) or CFTR-G551D with an extracellular 3HA tag (G) without stimulated phosphorylation (no fsk, non-tagged  $EC_{50}$  = 19.17  $\pm$  1.24  $\mu\text{M}$ , 3HA-tagged  $EC_{50}$  = 20.10  $\pm$  1.67  $\mu\text{M}$ ), low phosphorylation (50 nM fsk, non-tagged  $EC_{50}$  = 15.05  $\pm$  1.01  $\mu\text{M}$ , 3HA-tagged  $EC_{50}$  = 18.27  $\pm$  1.13  $\mu\text{M}$ ) and high phosphorylation (20  $\mu\text{M}$  fsk, non-tagged  $EC_{50}$  = 4.62  $\pm$  1.36  $\mu\text{M}$ , 3HA-tagged  $EC_{50}$  = 5.57  $\pm$  0.48  $\mu\text{M}$ ). Measurements were performed in the presence of a basolateral-to-apical chloride gradient after basolateral permeabilization with amphotericin B (100  $\mu\text{M}$ ). All CFBE experiments are n=3, error bars are SEM.

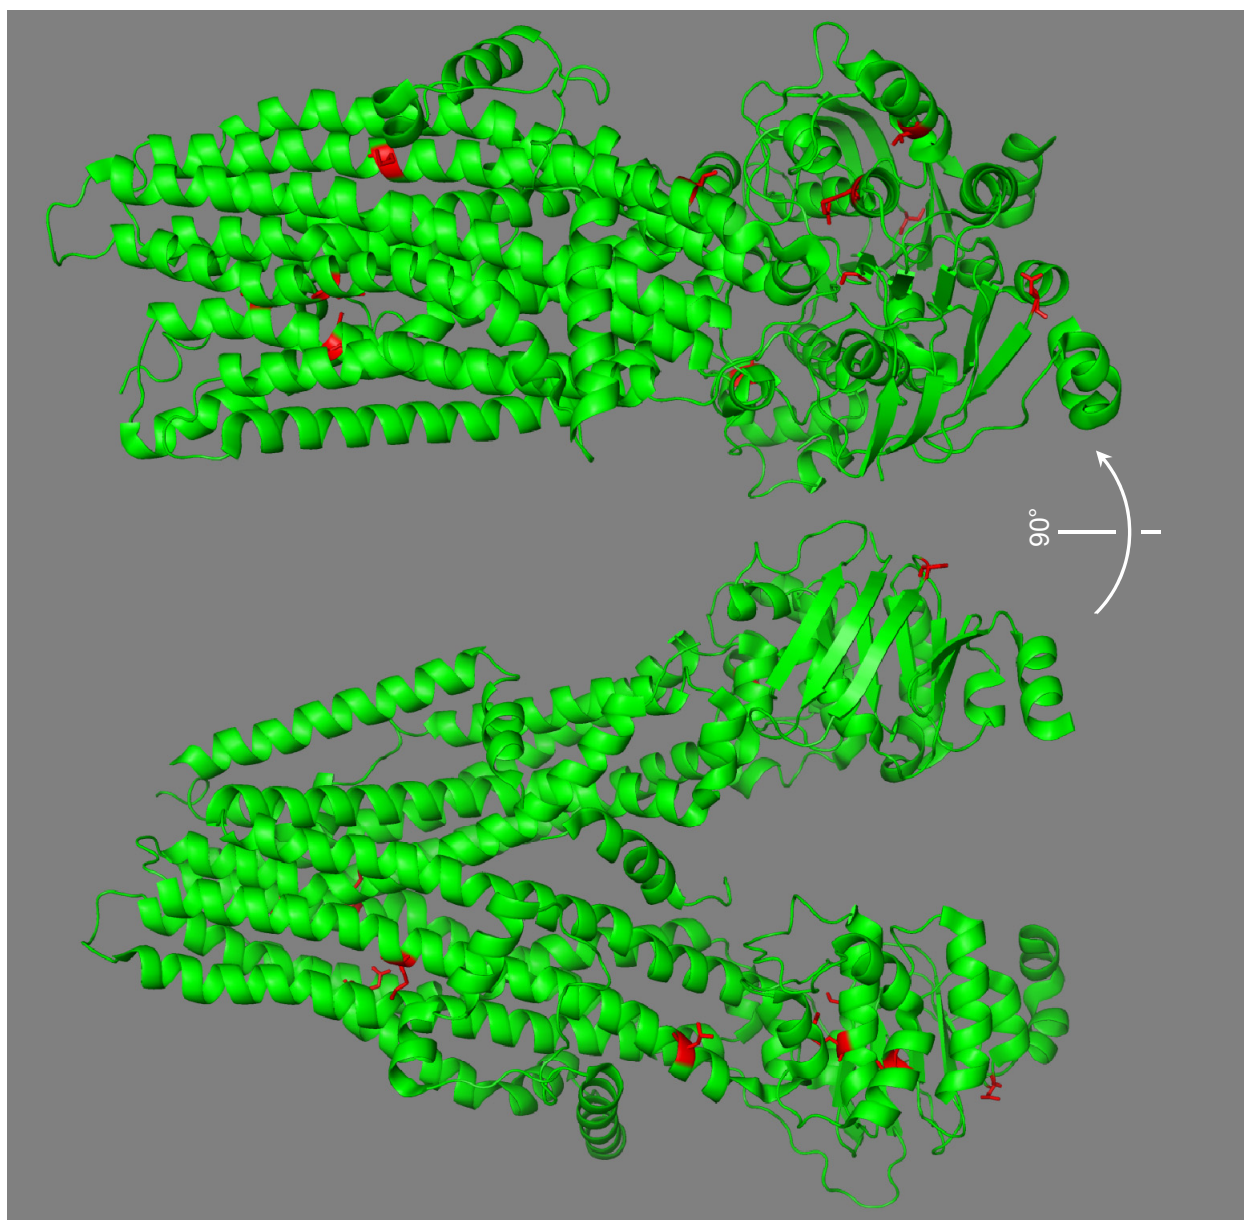

**Figure E2.** Selected CFTR2 mutations are distributed throughout the four major domains of CFTR. (A) High resolution electron cryo-microscopy model (1) of human CFTR showing the positions of the selected CFTR2 mutations in red. 90° rotation of the molecule is given, for better exposition of mutation position. The structure reiterates Fig. 2A.

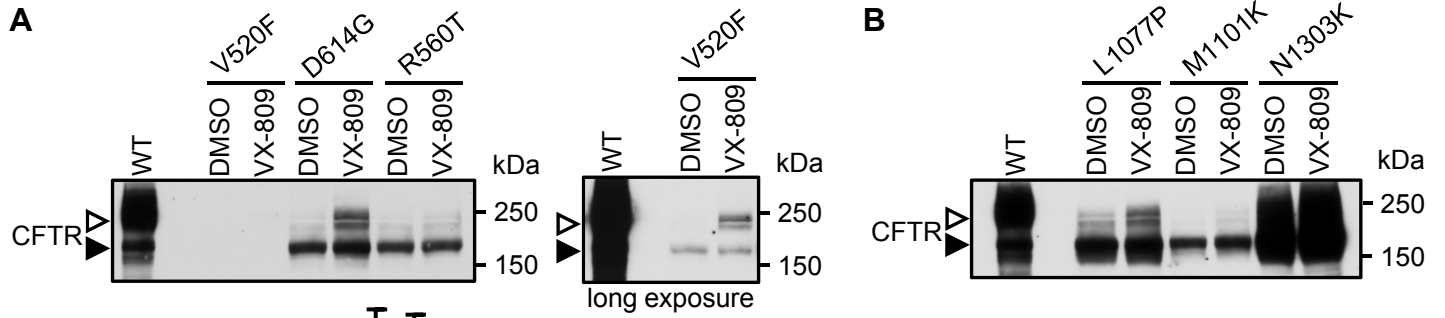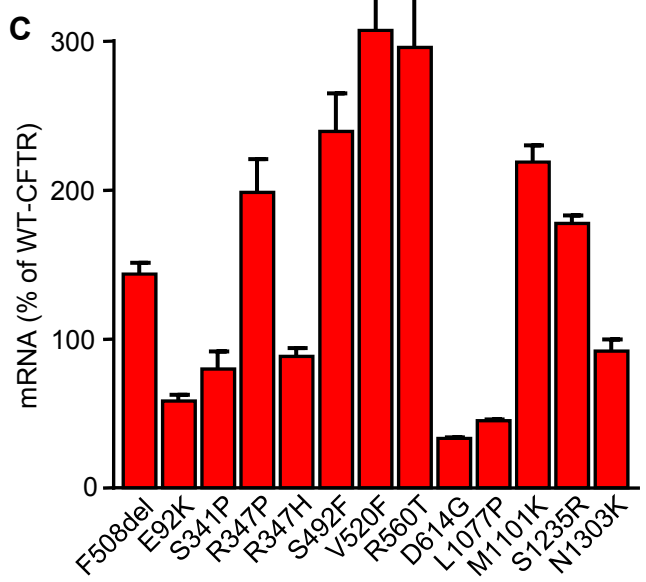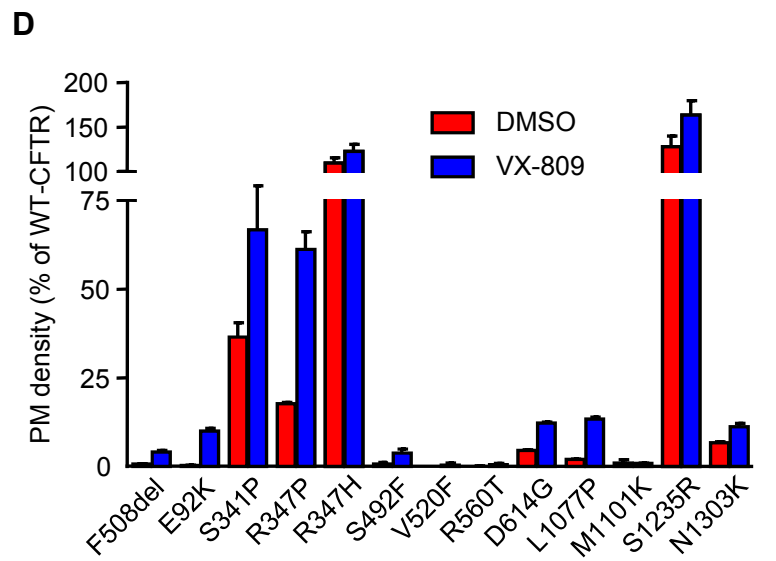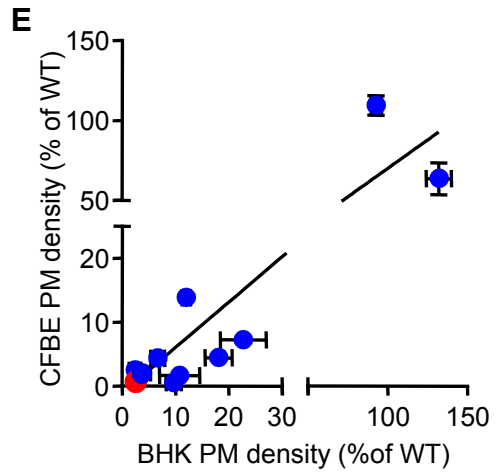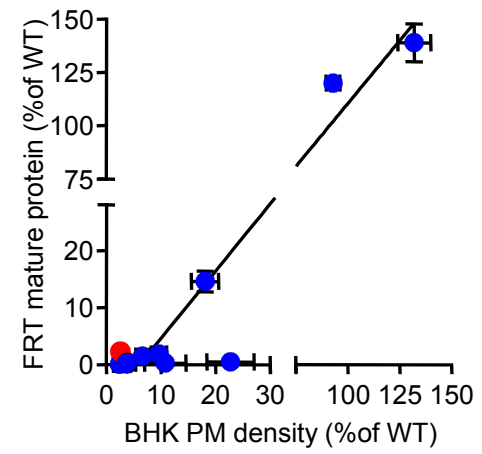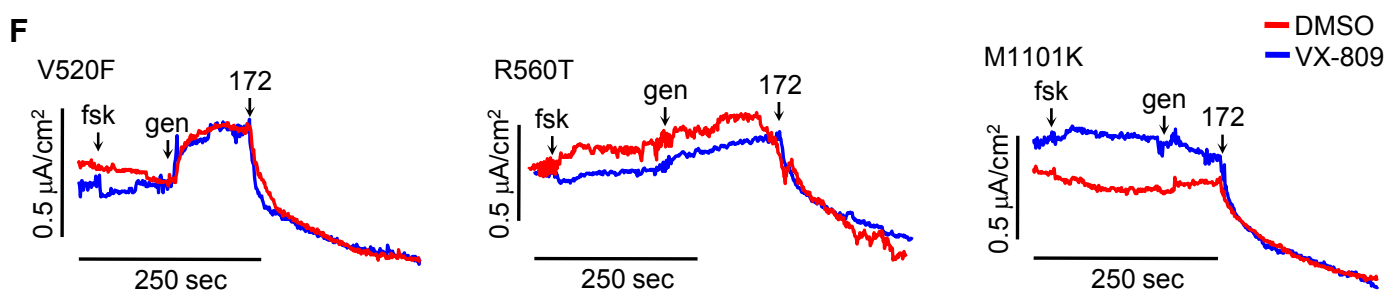

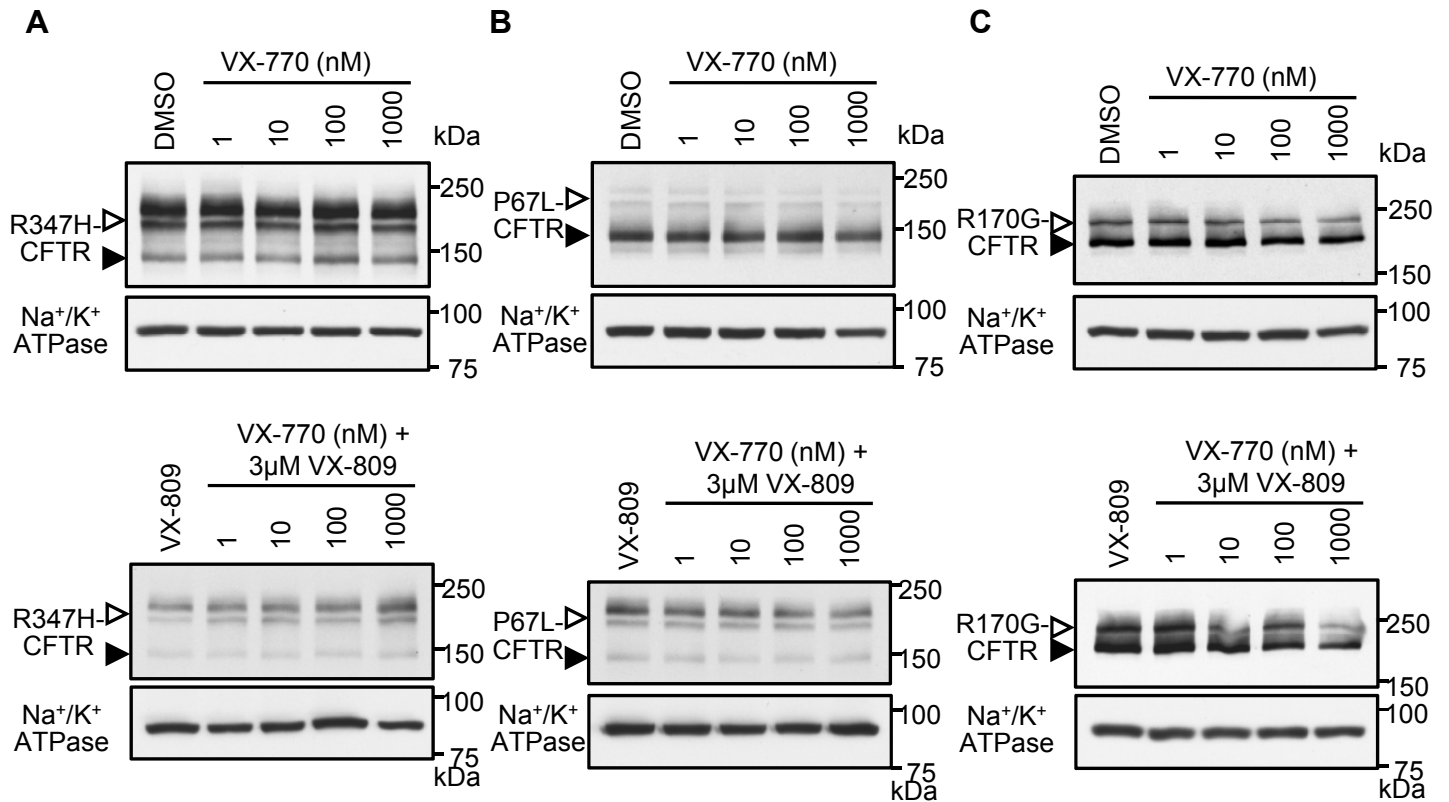

**Figure E4.** (A-C) CFBE cells expressing the indicated CFTR mutants were incubated for 24h increasing concentrations of VX-770 (*top*) with and without VX-809 (3  $\mu$ M, *bottom*) and subsequently lysed to collect protein samples. Protein was detected by immunoblotting with anti-HA antibody. Na<sup>+</sup>/K<sup>+</sup> ATPase was used as loading control. The empty arrowheads show the mature, complex glycosylated CFTR protein (C-band), and the filled arrowhead show the immature, core glycosylated protein (B-band).

## Supplementary tables

**Table E1. CFTR mutation list.**

| <b>cDNA Name</b>       | <b>Protein Name</b> | <b>Legacy Name</b> |
|------------------------|---------------------|--------------------|
| c.200C>T               | p.Pro67Leu          | P67L               |
| c.274G>A               | p.Glu92Lys          | E92K               |
| c.508C>G               | p.Arg170Gly         | R170G              |
| c.1021T>C              | p.Ser341Pro         | S341P              |
| c.1040G>C              | p.Arg347Pro         | R347P              |
| c.1040G>A              | p.Arg347His         | R347H              |
| c.1475C>T              | p.Ser492Phe         | S492F              |
| c.1521_1523delCTT      | p.Phe508del         | F508del            |
| c.1558G>T              | p.Val520Phe         | V520F              |
| c.1652G>A              | p.Gly551Asp         | G551D              |
| c.1679G>C              | p.Arg560Thr         | R560T              |
| c.1841A>G              | p.Asp614Gly         | D614G              |
| c.3230T>C              | p.Leu1077Pro        | L1077P             |
| c.3276C>A or c.3276C>G | p.Tyr1092X          | Y1092X             |
| c.3302T>A              | p.Met1101Lys        | M1101K             |
| c.3705T>G              | p.Ser1235Arg        | S1235R             |
| c.3909C>G              | p.Asn1303Lys        | N1303K             |

List of CFTR (RefSeq NM\_000492.3) mutants used throughout the entirety of this work.

**Table E2. Pearson correlation coefficient matrix.**

| Mutant |        | E92K  | L1077P | S1235R | S1235R |
|--------|--------|-------|--------|--------|--------|
|        | VX-809 | -     | -      | -      | +      |
| E92K   | -      |       |        |        |        |
| L1077P | -      | 0.450 |        |        |        |
| S1235R | -      | 0.454 | 0.334  |        |        |
| S1235R | +      | 0.444 | 0.285  | 0.938  |        |

Pearson correlation coefficient matrix calculated for the indicated CFTR mutants with respect to the effect of the twelve potentiators used for long term treatment on PM density.

**Table E3. p-value matrix.**

| Mutant |        | E92K     | L1077P   | S1235R   | S1235R |
|--------|--------|----------|----------|----------|--------|
|        | VX-809 | -        | -        | -        | +      |
| E92K   | -      |          |          |          |        |
| L1077P | -      | 0.141339 |          |          |        |
| S1235R | -      | 0.137338 | 0.288212 |          |        |
| S1235R | +      | 0.147773 | 0.368014 | 6.16E-06 |        |

Associated p-values calculated for the Pearson coefficients in Table E1.



## **Supplementary methods**

### **Primary nasal epithelium collection, conditional reprogramming and differentiation**

A complete protocol for the isolation of human nasal epithelia has been published (2). Briefly, primary nasal scrapes are harvested from the upper nasal turbinates of a donor under otoscopic observation and are quickly deposited in RPMI 1640 medium kept on ice. Explants are detached from the currettes and are seeded on collagen VII coated plastic 12 well plates with a minimum volume of BEGM. The epithelial cells are expected to migrate out of the explants overnight and are subsequently grown to confluence. To conditionally reprogram the HNE, cells are cocultured with irradiated 3T3-J2 fibroblasts (non-dividing), which act as feeder cells, in the presence of Rho-associated protein kinase (ROCK) inhibitor Y-27632 (10 $\mu$ M) (3). Under these conditions, the primary nasal epithelial cells can be expanded without undergoing senescence or terminal differentiation.

### **Primary bronchial and nasal cell differentiation**

Epithelial cell differentiation has been previously described (4). In brief, to obtain a polarized epithelial monolayer, bronchial or nasal cells are seeded onto Snapwell filter inserts at a confluence of 0.5x10<sup>6</sup> cells/filter. The monolayers are then differentiated under air-liquid interface by culturing in Ultrosor G (Pall Corporation, Saint-Germain-en-Laye, France) medium for a minimum of four weeks (4).

### **Short-circuit current measurement**

Current measurements were performed for CFBE, HBE and HNE cells as previously described (5, 6). Briefly, CFBE cells, expressing a channel variant or conditionally

reprogrammed primary airway cells are grown on filter insets in order to induce polarized expression of CFTR (RefSeq NM\_000492.3). Once mounted in the Ussing assembly, the apical side is immersed in an isotonic, low chloride solution, while the basolateral side is immersed in Krebs-Ringer bicarbonate solution.

### **CFTR PM Density Measurements by Luminescence and Fluorescence Assays**

In a 96-well format, the CFTR PM density was assessed by a modified enzyme-linked immunosorbent assay (ELISA) protocol (5). After the addition of chemiluminescent substrate (SuperSignal West Pico, Thermo Fisher Scientific), the luminescence signal was measured in a VICTOR Light plate reader (PerkinElmer).

If the signal was low, the ELISA signal was determined using Amplex Red (Thermo Fisher Scientific) as HRP substrate, in a 24 well format, as described (7). After addition of the fluorogenic substrate, cells were incubated for 5-15 minutes at room temperature. The fluorescence signal was measured with Infinite M1000 fluorescence plate reader (TECAN). For both types of density measurement, the signal was normalized with cell viability determined by alamarBlue (Thermo Fisher Scientific) assay, as described (8).

### **Immunofluorescence**

CR-HNE and CR-HBE were differentiated for a minimum of 4 weeks in UltrosorG medium at ALI. Filters were washed twice for 2 min at 37°C with PBS followed by 2 rapid PBS washes to remove mucins. Cells were then fixed (4% PFA, 10 min), permeabilized (0.2% Triton X-100, 5 min) and blocked (0.5% BSA in PBS + 0.1 mM  $\text{Ca}^{2+}$  + 1mM  $\text{Mg}^{2+}$ , 1 h), then incubated overnight at 4°C with primary antibodies against acetylated tubulin (1:200, sigma

T7451), zonula occludens-1 (1:100, Invitrogen 402200) or mucin5AC (1:200, Thermo Scientific 45M MS145PO). Nuclei were stained with DAPI (1:5000, Sigma D9542). After washing (4 times, 5 min with PBS), the cells were incubated with the following secondary antibodies at room temperature: mouse-A488 (1:1500, 1 h); rabbit-A555 (1:1000, 1 h). After washing (4 times, 5 min with PBS), the filter inserts were mounted between a glass slide and a coverslip and images were acquired with a Zeiss LSM 780 confocal microscope (Carl Zeiss Canada, Toronto, Ontario, Canada) equipped with a Plan-Apochromat 63x/1.40 oil differential interference contrast objective.

### **Quantitative RT-PCR**

Total RNA was extracted from polarized CFBE cells grown on plastic in 24 well plates using miRNeasy Mini Kit (Qiagen, Hilden, Germany) and analyzed using the one-step QuantiFast SYBR Green RT-PCR Kit (Qiagen) following the manufacturer's recommendations. Data were analyzed by efficiency-corrected comparative quantification with MxPro QPCR software (Agilent, Santa Clara, California, USA). CFTR was detected with primers sense gaggaaggatacagacagcgctg and antisense gaagccagctctctatcccattc. Variations in RNA loading amount were accounted for by normalizing to GAPDH (sense primer catgagaagtatgacaacagcct, antisense primer agtccttccacgatacacaagt).

## Supplementary References

1. Van Goor F, Yu H, Burton B, Hoffman BJ. Effect of ivacaftor on CFTR forms with missense mutations associated with defects in protein processing or function. *J Cyst Fibros*. 2014;13(1):29-36.
2. Muller L, Brighton LE, Carson JL, Fischer WA, 2nd, Jaspers I. Culturing of human nasal epithelial cells at the air liquid interface. *Journal of visualized experiments : JoVE*. 2013(80):e50646.
3. Liu X, Ory V, Chapman S, Yuan H, Albanese C, Kallakury B, et al. ROCK inhibitor and feeder cells induce the conditional reprogramming of epithelial cells. *The American journal of pathology*. 2012;180(2):599-607.
4. Neuberger T, Burton B, Clark H, Van Goor F. Use of primary cultures of human bronchial epithelial cells isolated from cystic fibrosis patients for the pre-clinical testing of CFTR modulators. *Methods in Molecular Biology (Clifton, Nj)*. 2011;741:39-54.
5. Veit G, Bossard F, Goepf J, Verkman AS, Galiotta LJ, Hanrahan JW, et al. Proinflammatory Cytokine Secretion is Suppressed by TMEM16A or CFTR Channel Activity in Human Cystic Fibrosis Bronchial Epithelia. *Molecular biology of the cell*. 2012.
6. Namkung W, Finkbeiner WE, Verkman AS. CFTR-adenylyl cyclase I association responsible for UTP activation of CFTR in well-differentiated primary human bronchial cell cultures. *Molecular biology of the cell*. 2010;21(15):2639-48.
7. Gluzman R, Okiyoneda T, Mulvihill CM, Rini JM, Barriere H, Lukacs GL. N-glycans are direct determinants of CFTR folding and stability in secretory and endocytic membrane traffic. *J Cell Biol*. 2009;184(6):847-62.

8. Veit G, Avramescu RG, Perdomo D, Phuan PW, Bagdany M, Apaja PM, et al. Some gating potentiators, including VX-770, diminish  $\Delta F508$ -CFTR functional expression. *Sci Transl Med.* 2014;6(246):246ra97.
